# Supplementary material for: Impact of Sulfur Infiltration Time and Its Content in an N-doped Mesoporous Carbon for Application in Li-S Batteries
Source: MDPI journal article supplement (doi:10.3390/batteries8060058), 2022-06-17
Supplement: s1 [file s1]

## Supplementary material

# Impact of Sulfur Infiltration Time and Its Content in an N-doped Mesoporous Carbon for Application in Li-S Batteries

Jennifer Laverde <sup>1</sup>, Nataly C. Rosero-Navarro <sup>2,\*</sup>, Akira Miura <sup>2</sup>, Robison Buitrago-Sierra <sup>3</sup>, Kiyoharu Tadanaga <sup>2</sup> and Diana López <sup>1</sup>

<sup>1</sup> Instituto de Química, Facultad de Ciencias Exactas y Naturales, Universidad de Antioquia, calle 70 No. 52-21, Medellín 050010, Colombia; jennifer.laverde@udea.edu.co; diana.lopez@udea.edu.co

<sup>2</sup> Faculty of Engineering, Hokkaido University, Sapporo 060-86-28, Japan; rosero@eng.hokudai.ac.jp; amiura@eng.hokudai.ac.jp; tadanaga@eng.hokudai.ac.jp

<sup>3</sup> Facultad de Ingeniería, Instituto Tecnológico Metropolitano-ITM, Medellín, Colombia; robinsonbuitrago@itm.edu.co

\* Correspondence: rosero@eng.hokudai.ac.jp

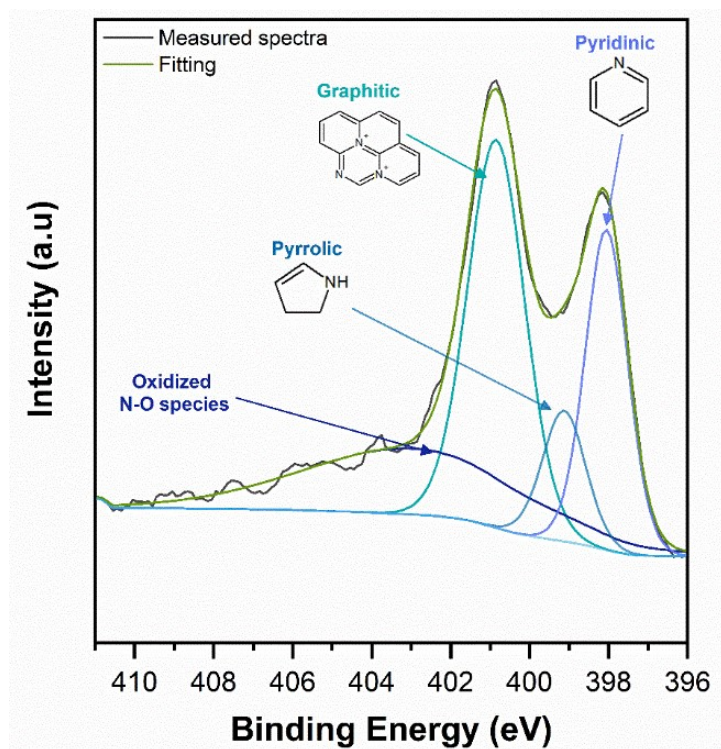

**Figure S1.** High-resolution XPS spectra of N1s for MC material.

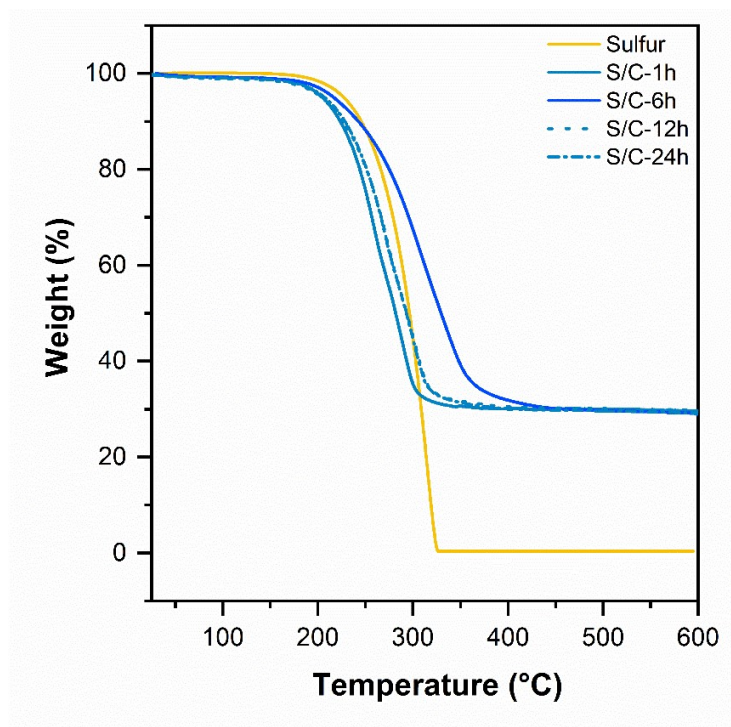

**Figure S2.** TGA analysis for sulfur sublimation of the S/C composites with 70% of S<sub>8</sub> and modifying the infiltration time.

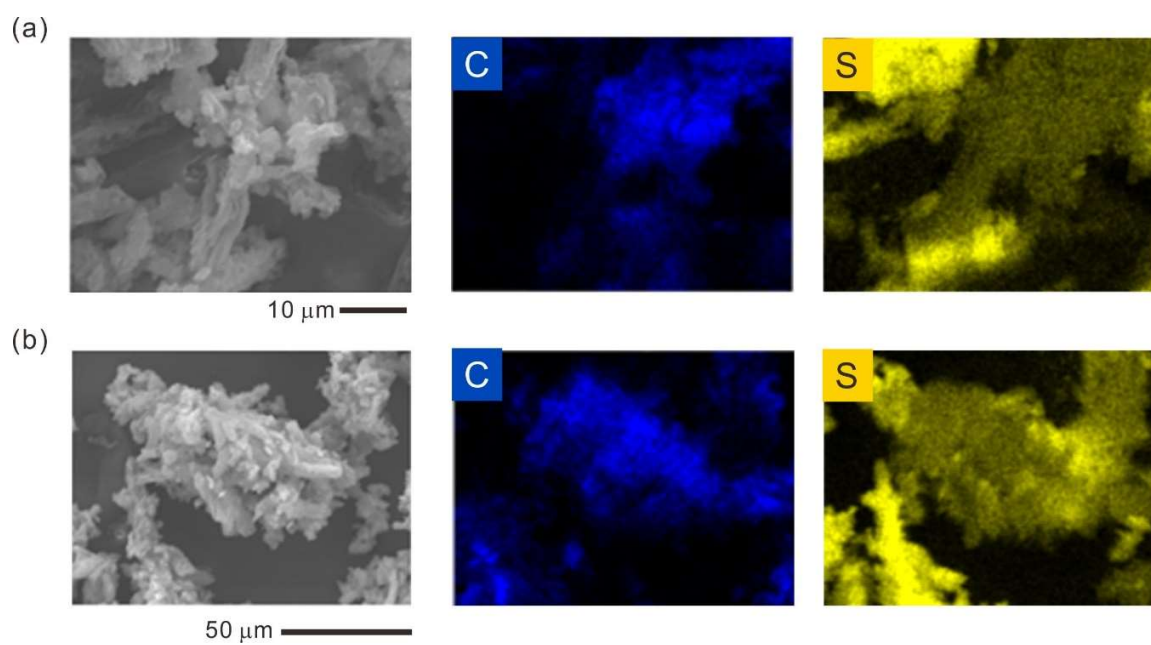

**Figure S3.** SEM-EDS analysis of (a) S/C-1h and (b) S/C-24h. EDS mapping includes carbon and sulfur analysis.

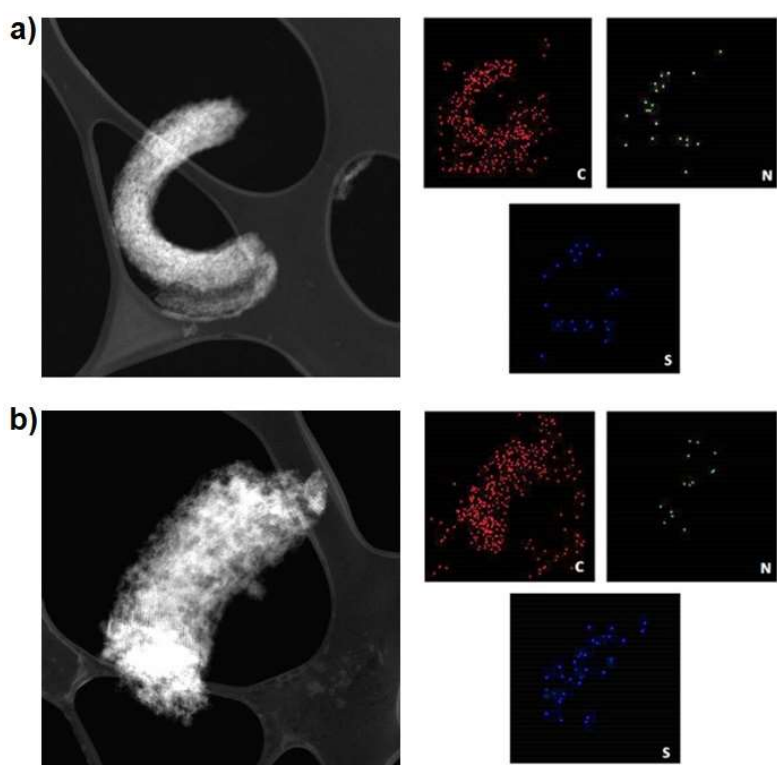

**Figure S4.** TEM elemental mapping of the **(a)** S/C 70:30, 24h and **(b)** S/C 70:30, 6h composites. Mapping includes sulfur, carbon, and nitrogen analysis.

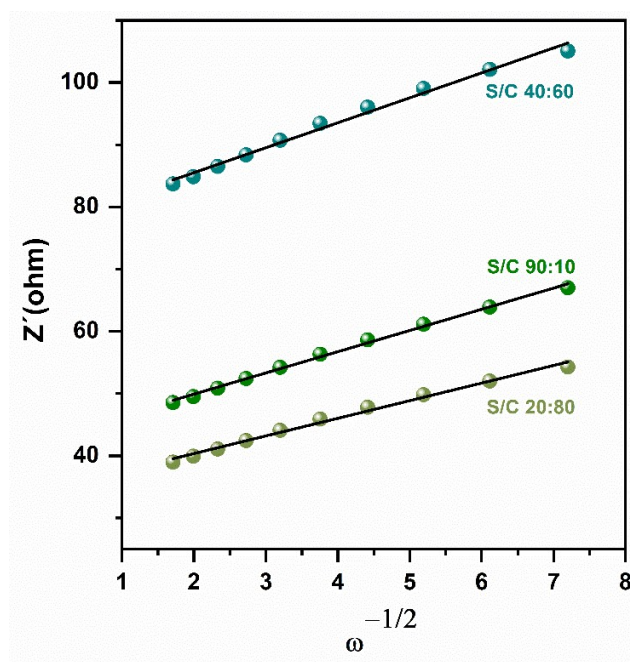

**Figure S5.** Relationship between  $Z'$  and  $\omega^{-1/2}$  in the low-frequency region.

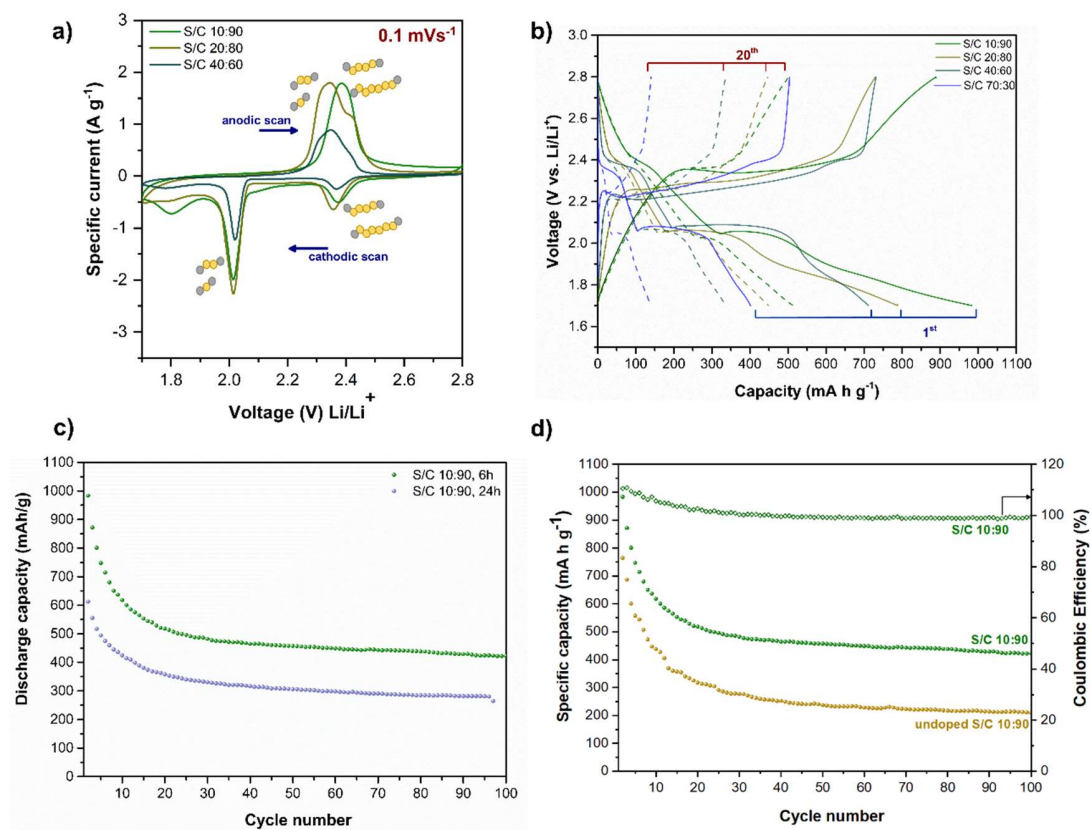

**Figure S6.** (a) Cyclic voltammetry (CV) curves of 2<sup>nd</sup> cycle at scan rate of 0.1 mV s<sup>-1</sup> (b) Cycling performance efficiency at 0.1 C for 1<sup>st</sup> and 20<sup>th</sup> cycle of the batteries with the composites varying sulfur content, (c) S/C 10:90 cycling with different infiltration time, and (d) electrochemical comparison of the mesoporous carbon with and without nitrogen functionalization.
